# Supplementary material for: M13 bacteriophage spheroids as scaffolds for directed synthesis of spiky gold nanostructures
Source: Royal Society of Chemistry journal article supplement (doi:10.1039/c8nr03229g), 2018-01-01
Supplement: c8nr03229g1.pdf [file c8nr03229g1.pdf]

## M13 bacteriophage spheroids as scaffolds for directed synthesis of spiky gold nanostructures

Tam-Triet Ngo-Duc<sup>1</sup>, Joshua M. Plank<sup>2</sup>, Gongde Chen<sup>3</sup>, Reed E. S. Harrison<sup>4</sup>, Dimitrios Morikis<sup>4</sup>, Haizhou Liu<sup>3</sup>, Elaine D. Haberer<sup>1,2</sup>

<sup>1</sup>*Materials Science and Engineering Program, University of California, Riverside*

<sup>2</sup>*Department of Electrical and Computer Engineering, University of California, Riverside*

<sup>3</sup>*Department of Chemical and Environmental Engineering, University of California, Riverside*

<sup>4</sup>*Department of Bioengineering, University of California, Riverside*

Email: [haberer@ucr.edu](mailto:haberer@ucr.edu)

### Results and discussion

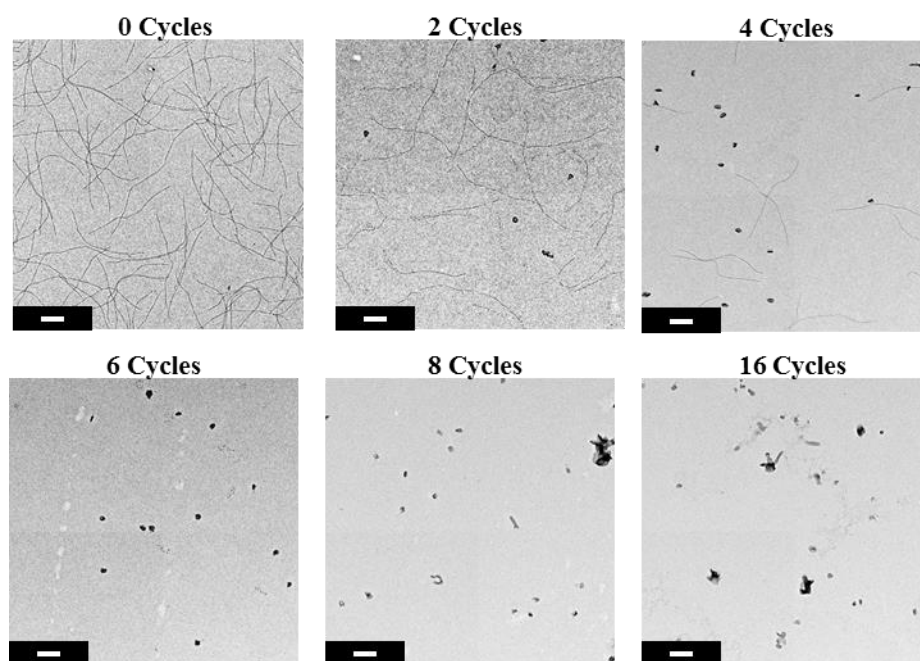

**Fig. S1.** Transmission electron microscopy (TEM) images of the gold-binding phage transformation progression with increasing cycle number. Scale bar: 200 nm.

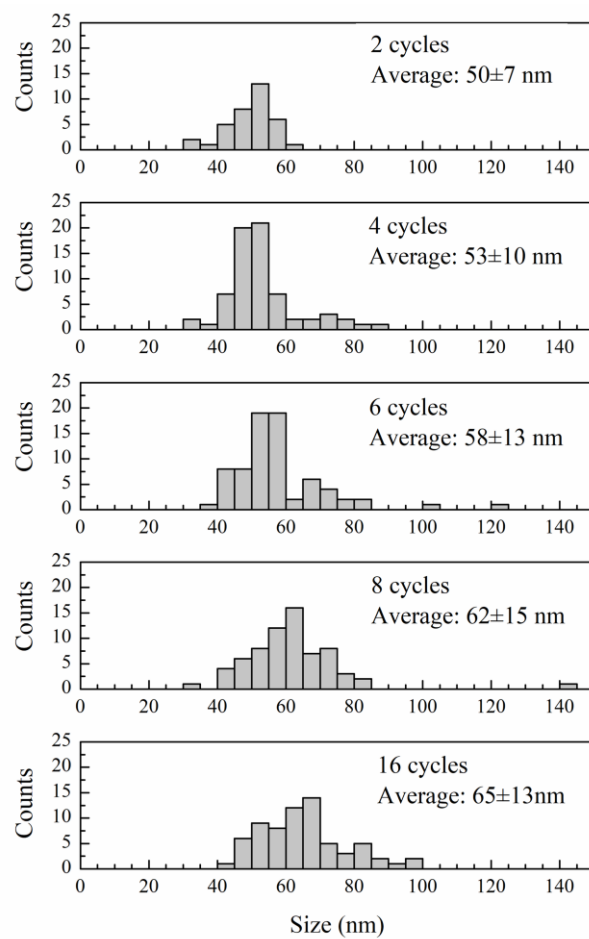

**Fig. S2.** Histograms of gold-binding M13 spheroid size distributions with increasing chloroform treatment cycle number ( $N \geq 57$ ).

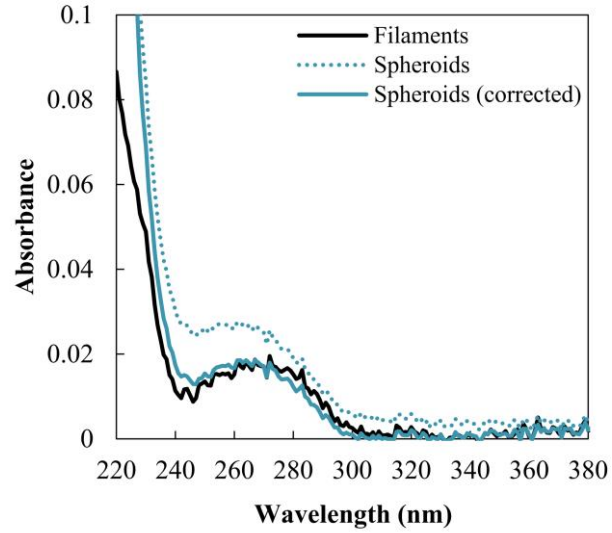

**Fig. S3.** UV-Vis absorbance spectra of gold-binding filaments, spheroids, and Rayleigh scattering-corrected spheroids. On average, the spheroid concentration was 99.8% of the initial filament concentration, indicating that very little viral template was lost during the conversion process.

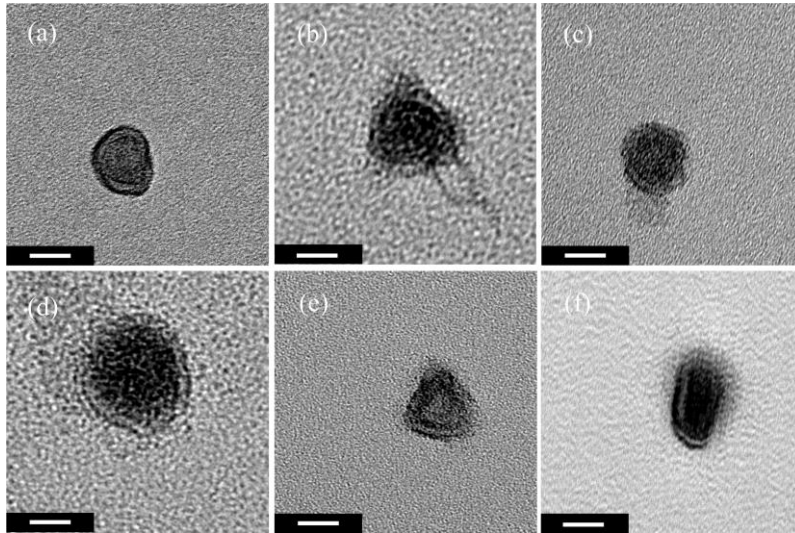

**Fig. S4.** (a-f) High magnification TEM images of gold-binding spheroids after 5 cycles, showing the characteristic shape of chloroform-treated Ff bacteriophage. Samples were stained with 2% uranyl acetate. Scale bar: 20 nm.

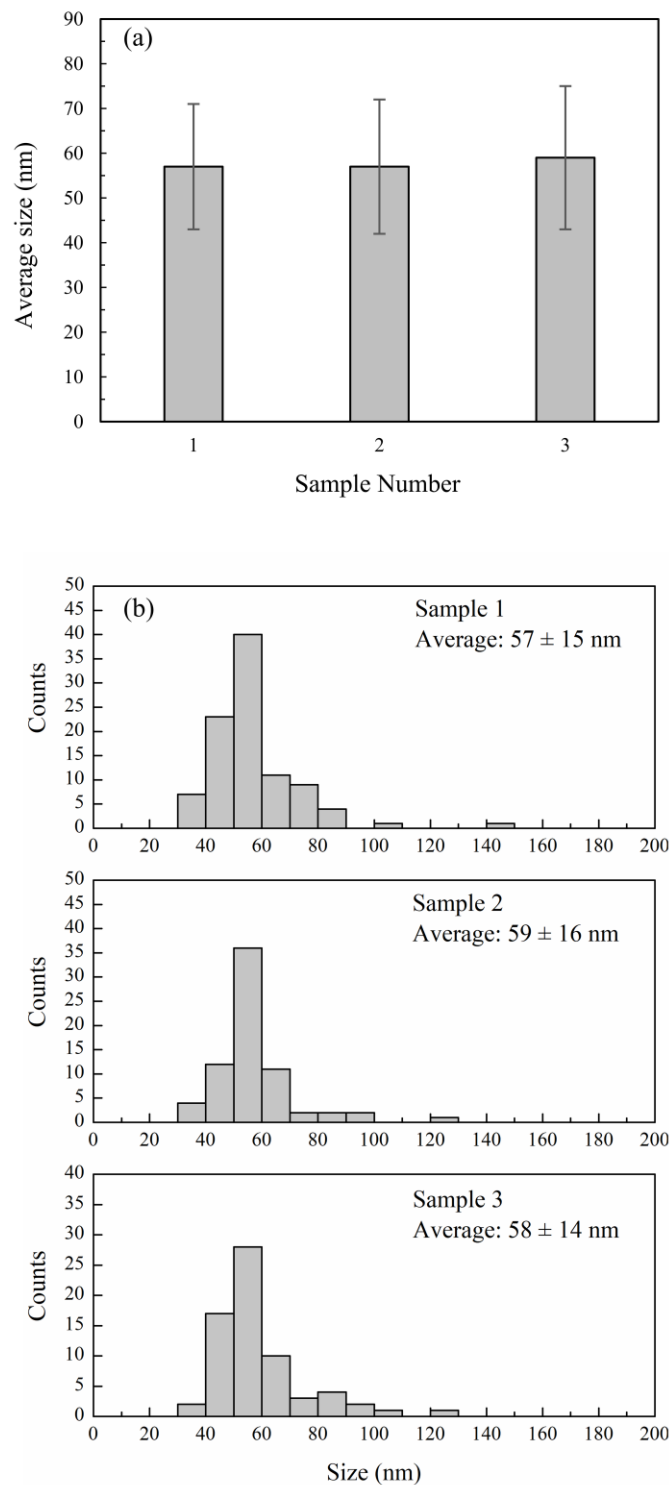

**Fig. S5.** (a) Average sizes and (b) size distributions from three samples of gold-binding spheroids created using a 5 cycle chloroform treatment process ( $N = 70$ ).

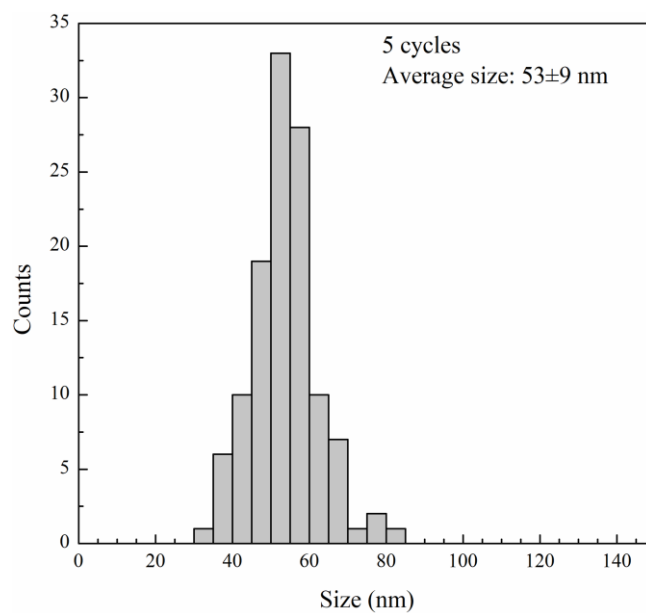

**Fig. S6.** Size distribution of wild-type M13 spheroids following a 5 cycle chloroform treatment process (N = 118).

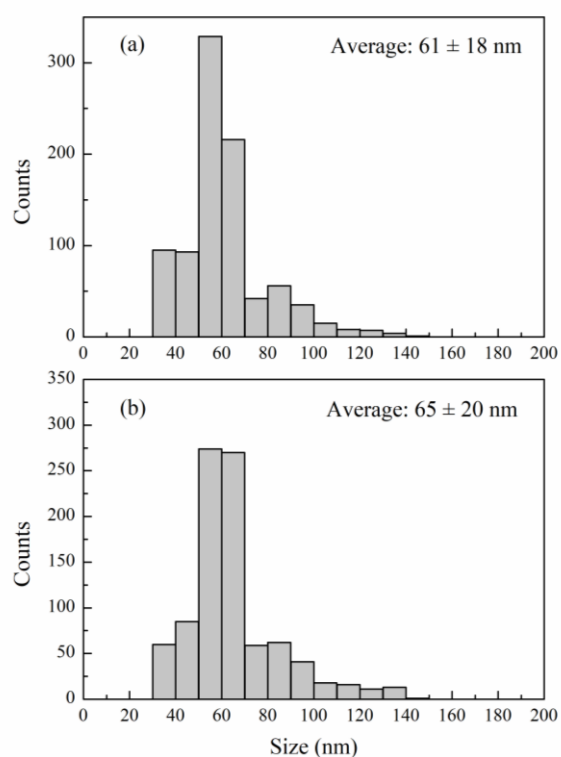

**Fig. S7.** Histograms of spheroid sizes for transformations completed with initial phage concentrations of (a)  $5 \times 10^8$  pfu/ $\mu$ L and (b)  $1 \times 10^9$  pfu/ $\mu$ L (N > 900).

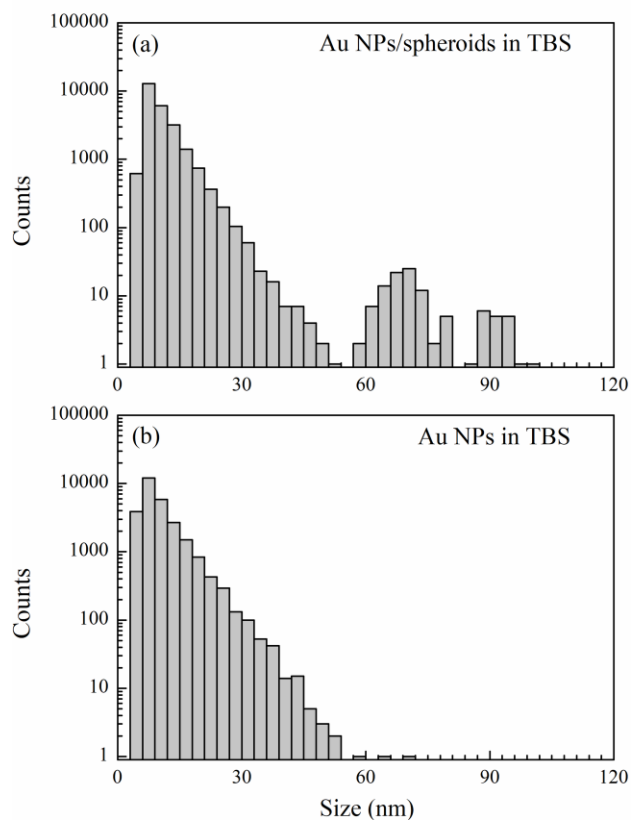

**Fig. S8.** Histograms of gold colloid assembly size when prepared in dilute TBS (a) with ( $N = 11600$ ) and (b) without gold-binding M13 spheroids ( $N = 27900$ ).

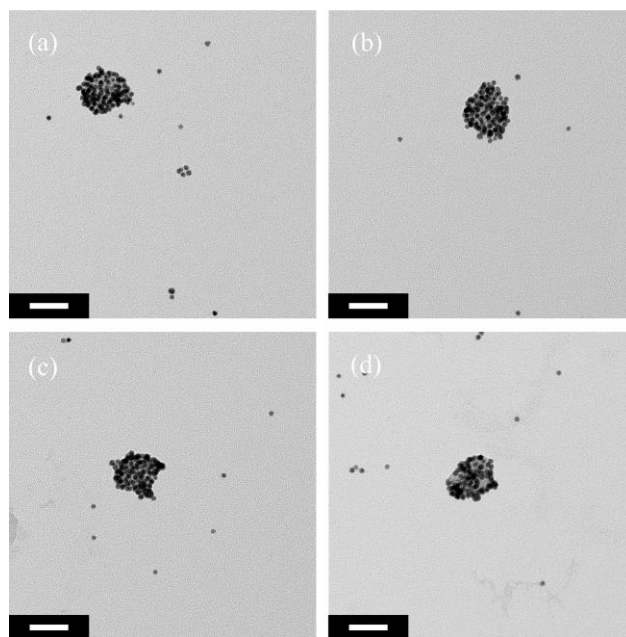

**Fig. S9.** (a-d) TEM images of 5 nm gold nanoparticles assembled on gold-binding spheroids. Samples were stained with 2% uranyl acetate to show spatial correlation between gold nanoparticle clusters and M13 spheroidal template. Scale bar: 50 nm.

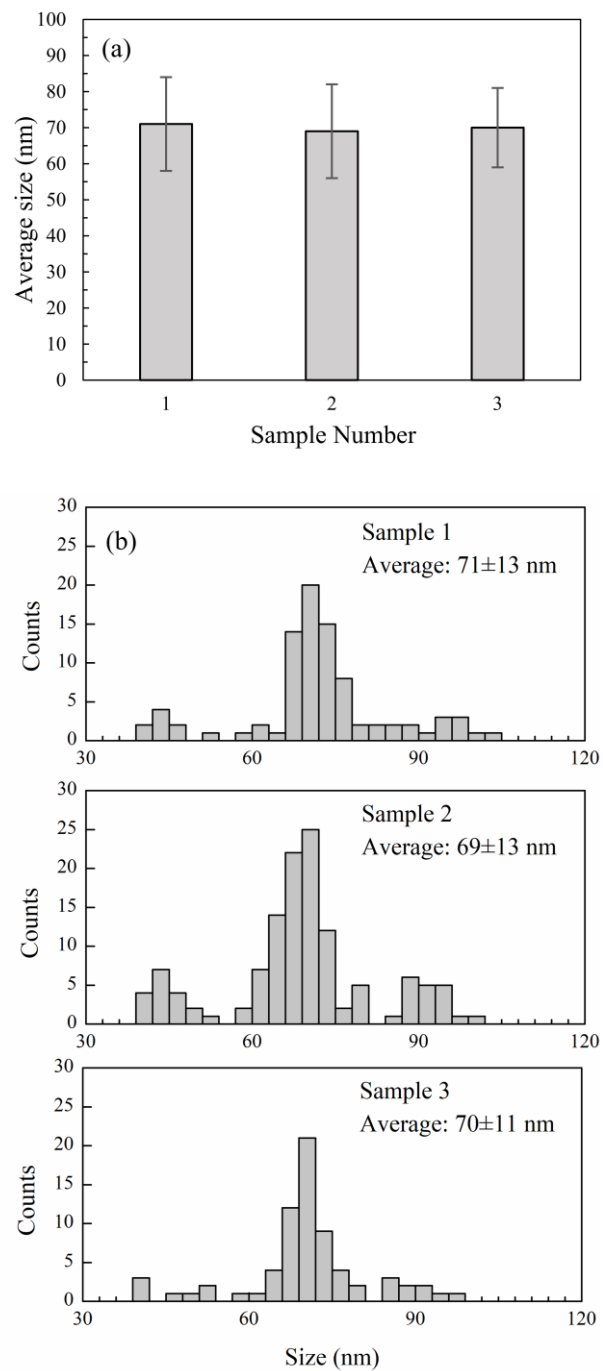

**Fig. S10.** (a) Average sizes and (b) size distributions from three samples of gold-binding spheroids decorated with gold nanoparticles ( $N \geq 70$ ).



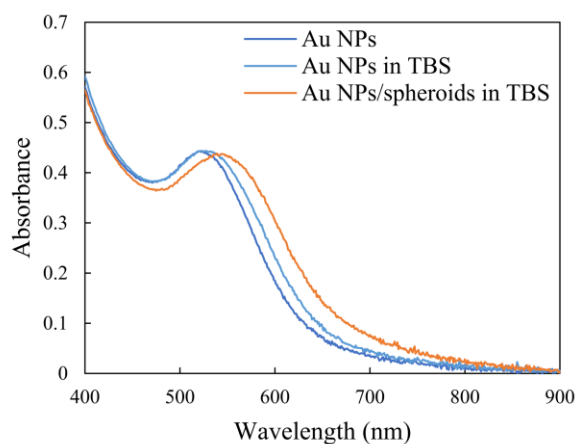

**Fig. S11.** UV-Vis absorbance spectra of as-received gold colloid, and gold colloid assemblies prepared in dilute TBS with and without gold-binding M13 spheroids.

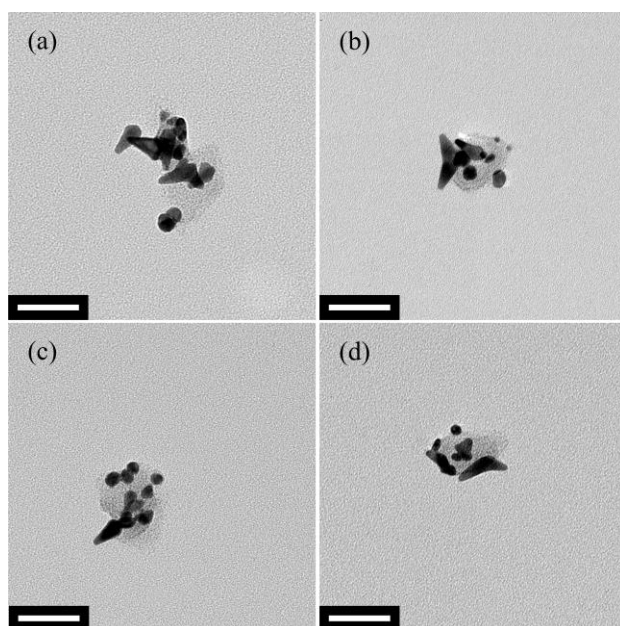

**Fig. S12.** (a-d) TEM images of gold-binding spheroid-templated gold synthesis products formed using a final  $\text{NaBH}_4$  concentration of  $31.3 \mu\text{M}$ . Samples were stained with 2% uranyl acetate such that viral proteins associated with the gold structures can be seen. Scale bar: 50 nm.

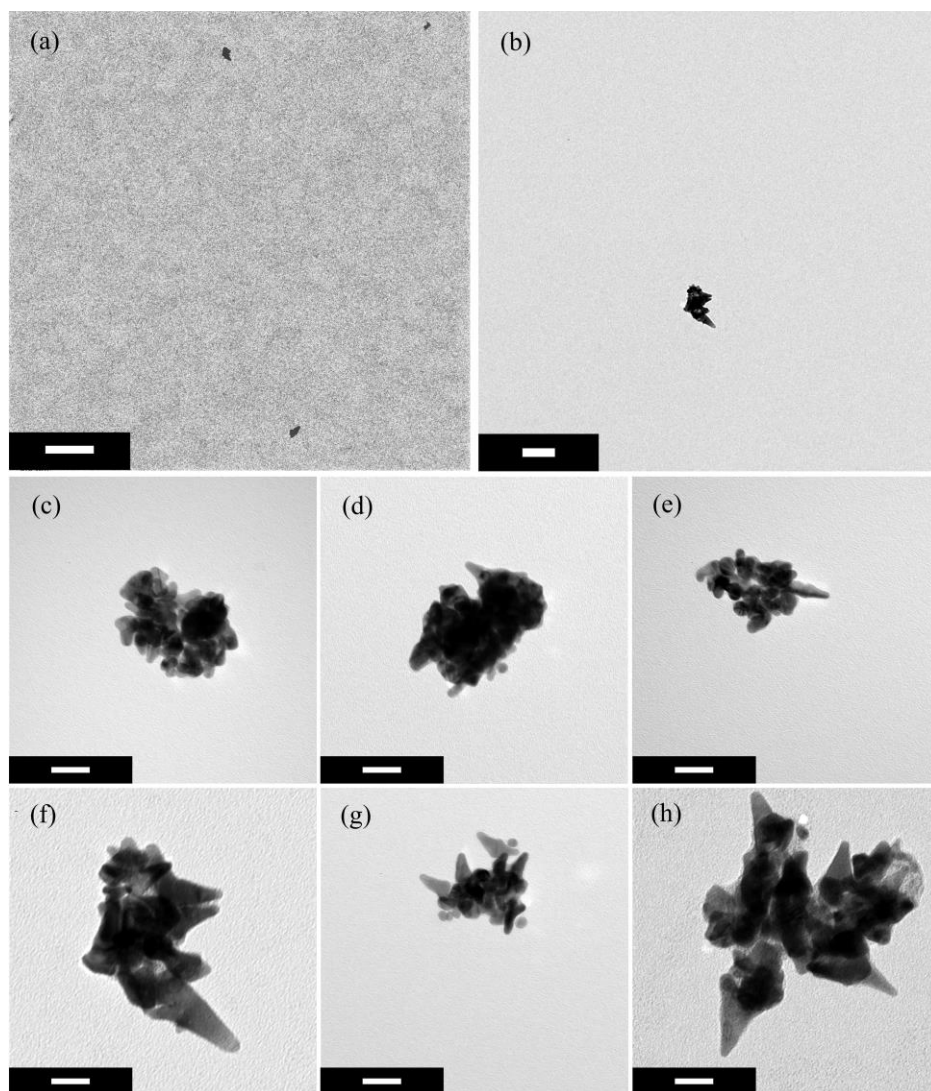

**Fig. S13.** TEM images of gold synthesis products formed in the presence of gold-binding spheroids using a final  $\text{NaBH}_4$  concentration of  $62.5 \mu\text{M}$ . (a) scale bar: 500 nm; (b) scale bar: 100 nm; (c-h) scale bar: 20 nm. A variety of spike-like morphologies were found on the spheroids producing a broad range of gold nanostructure sizes. Homogenous nucleation of gold unassociated with the template was not observed.

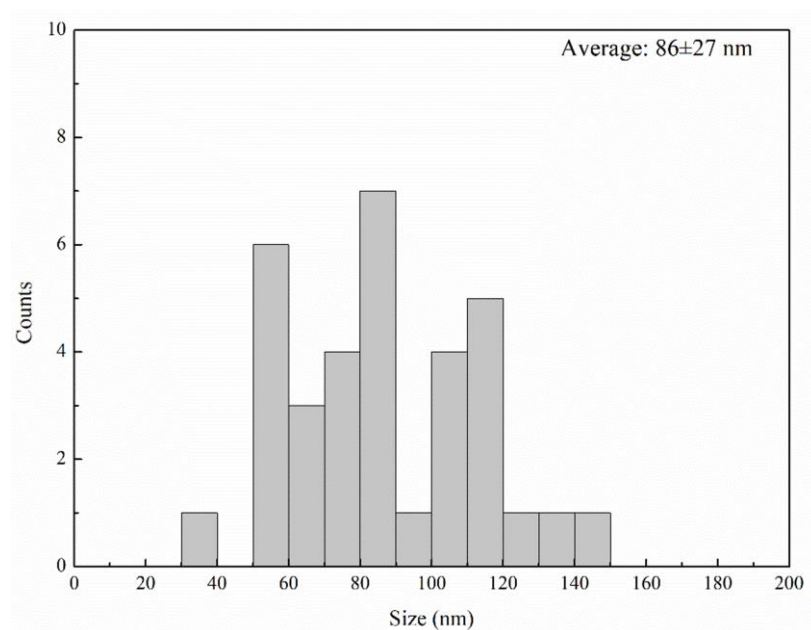

**Fig. S14.** Size distribution of the synthesized gold nanostructures on gold-binding spheroid templates using a final  $\text{NaBH}_4$  concentration of  $62.5 \mu\text{M}$  ( $N = 35$ ).

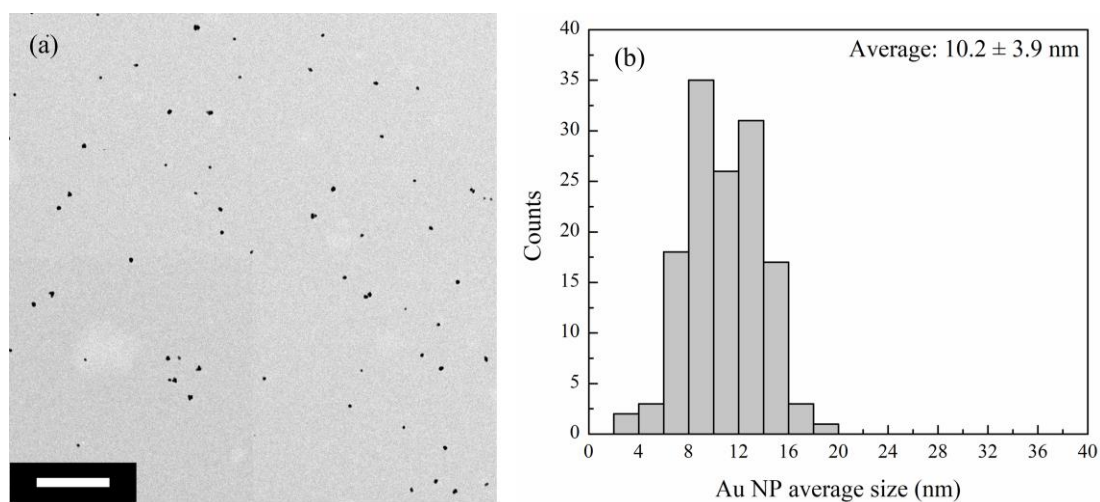

**Fig. S15.** (a) TEM image and (b) histogram of particle sizes for synthesis products formed without a gold-binding spheroidal viral template using a final  $\text{NaBH}_4$  concentration of  $62.5 \mu\text{M}$  ( $N = 136$ ); scale bar: 200 nm.

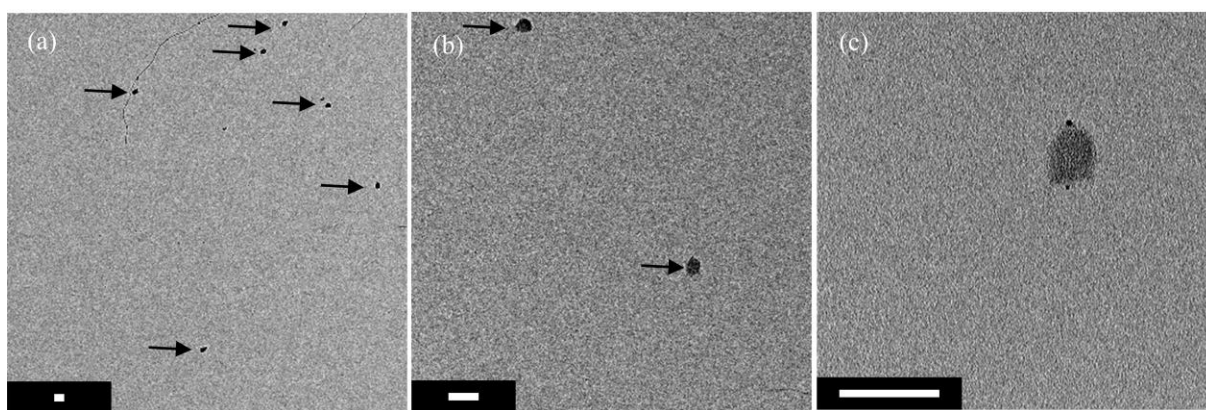

**Fig. S16.** (a-c) TEM images of gold synthesis products formed in the presence of wild-type spheroids using a final  $\text{NaBH}_4$  concentration of  $62.5 \mu\text{M}$ . Samples were stained with 2% uranyl acetate. Black arrows in lower magnification images indicate wild-type spheroids. Scale bar: 100 nm.
